# Supplementary material for: Predictors of medication adherence in a large 1-year prospective cohort of individuals with schizophrenia: insights from the multicentric FACE-SZ dataset
Source: PubMed Central journal article supplement (PMC10630458; doi:10.1038/s41398-023-02640-x), 2023-11-07
Supplement: 41398_2023_2640_MOESM1_ESM.pdf [file 41398_2023_2640_MOESM1_ESM.pdf]

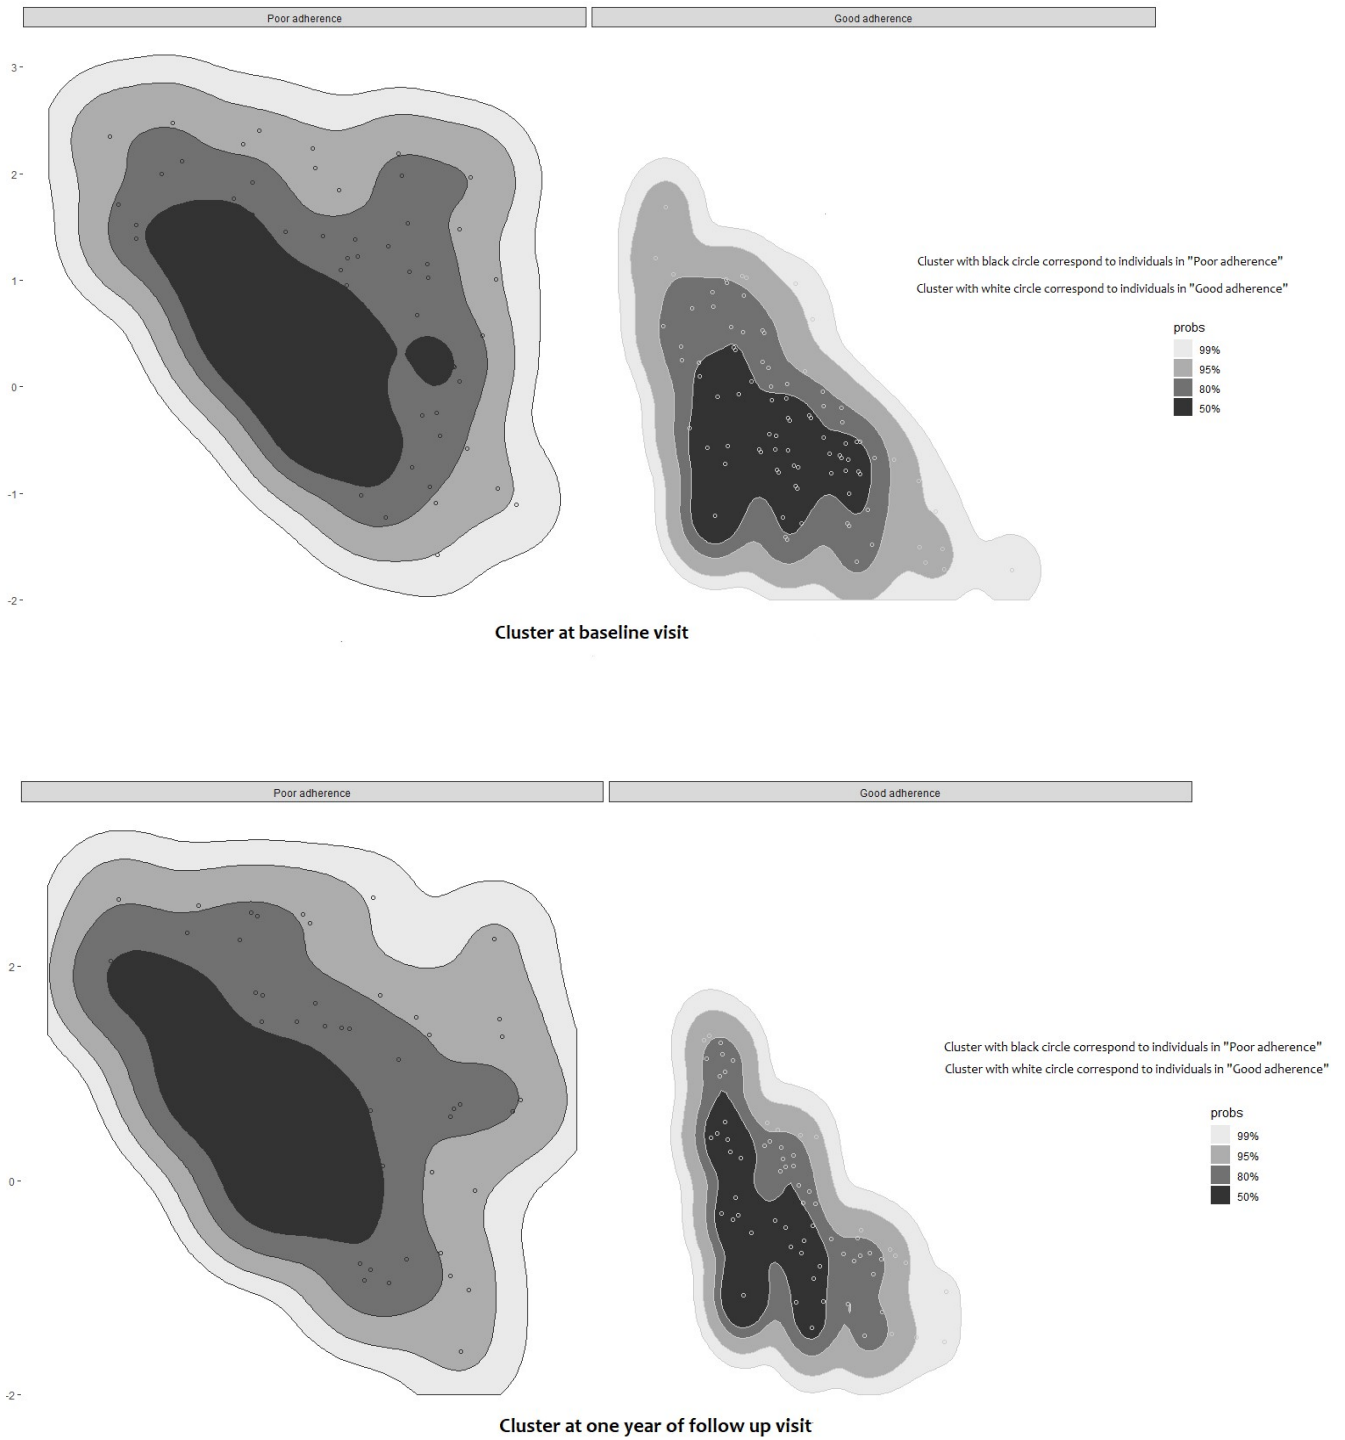

Figure S1. Cluster plots at baseline and one-year follow-up.
